# Supplementary material
Source: PubMed Central journal article supplement (PMC4056769)

Trends in Childhood Brain Tumor Incidence, 1973-2009

Journal of Neuro-Oncology

Roberta McKean-Cowdin<sup>1</sup>, Pedram Razavi<sup>1,2</sup>, Jessica Barrington-Trimis<sup>1</sup>, Rachel Tobias Baldwin<sup>1</sup>,  
Shahab Asgharzadeh<sup>2,3</sup>, Myles Cockburn<sup>1</sup>, Tarik Tihan<sup>4</sup>, Susan Preston-Martin<sup>1</sup>

To whom communications regarding the manuscript should be directed:

Roberta McKean-Cowdin, PhD

University of Southern California Keck School of Medicine

2001 N. Soto St., 318-D

Los Angeles, CA 90089

Phone: (323) 865-0413

Fax: (323) 442-7749

Email: [mckeanco@usc.edu](mailto:mckeanco@usc.edu)

**Online Resource 1** Age-Adjusted Incidence Rate (AAIR) of pediatric brain tumors in Los Angeles Children diagnosed at 0-14 years of age by socioeconomic status, Los Angeles Cancer Surveillance Program, 1972-2006

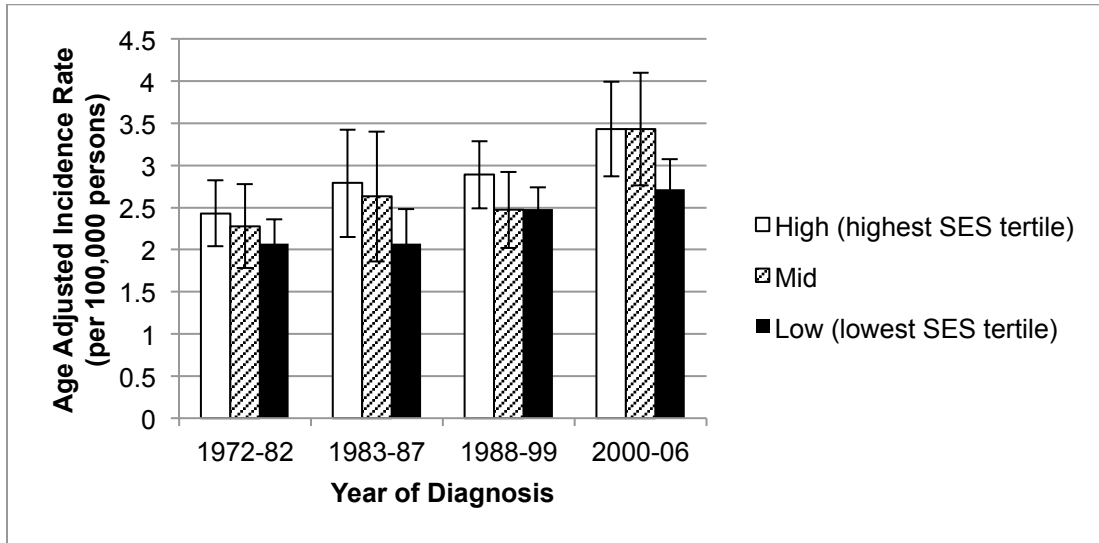

**Online Resource 2** Age-adjusted incidence rates by site within the brain, SEER 9, 1973-2009

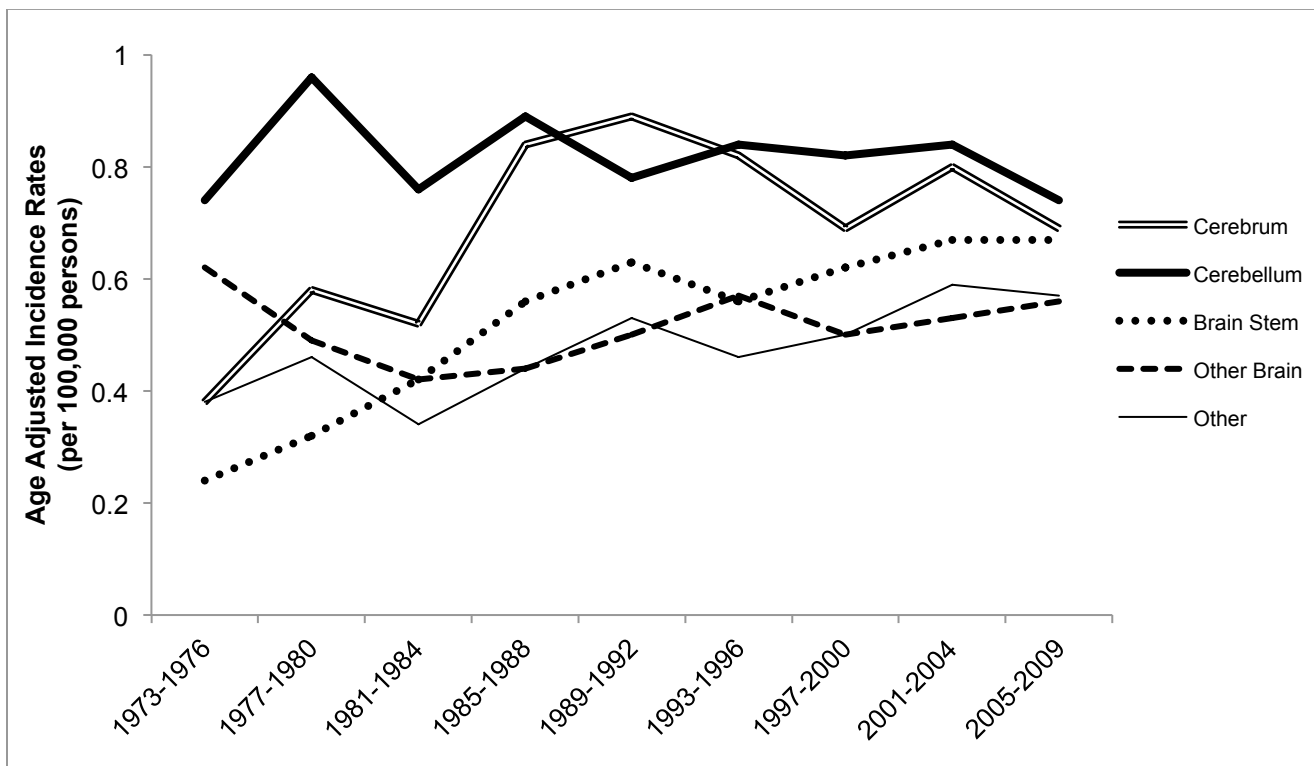

Supplement: NIHMS513848-supplement-11060_2013_1212_MOESM1_ESM.pdf [file NIHMS513848-supplement-11060_2013_1212_MOESM1_ESM.pdf]
